# Supplementary material
Source: PubMed Central journal article supplement (PMC8027831)
Supplement: 41396_2020_788_MOESM2_ESM.pdf [file 41396_2020_788_MOESM2_ESM.pdf]

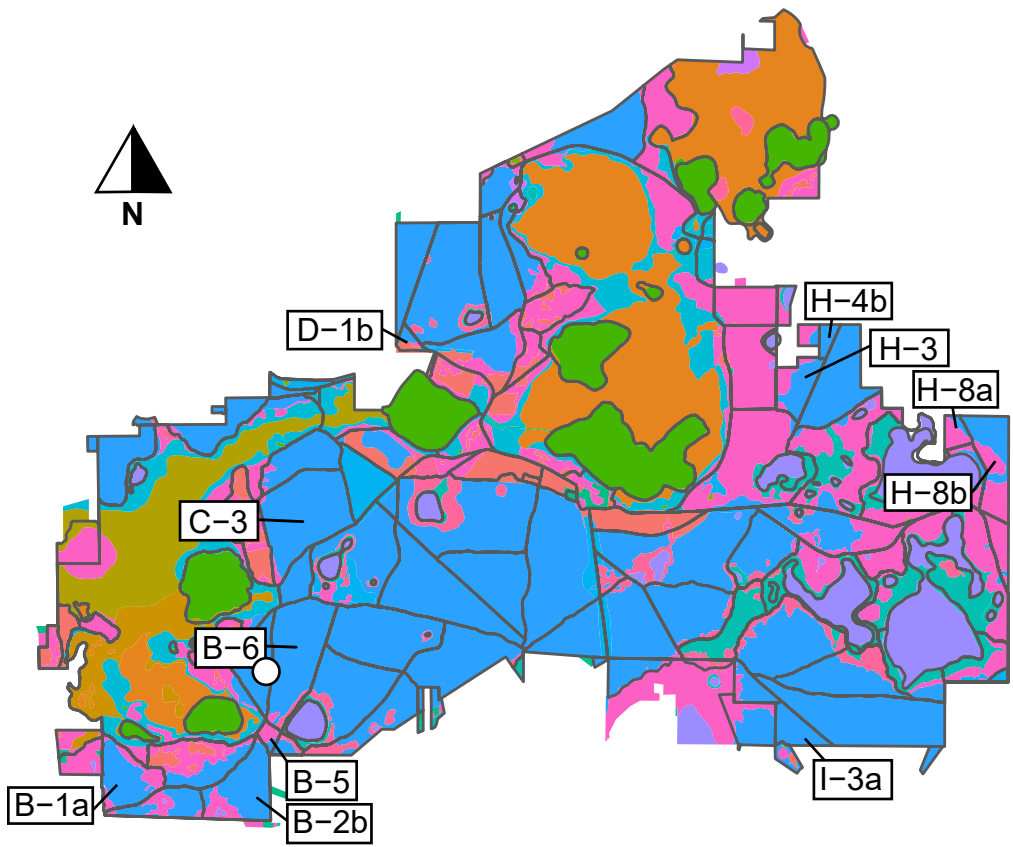

- ### FNAI communities
- Abandoned Field
  - Basin Marsh
  - Basin Swamp
  - Baygall
  - Borrow Area
  - Clastic Upland Lake
  - Ephemeral Creek
  - Improved
  - Lake Bottom
  - Mesic Hammock
  - Pine Plantation
  - Sandhill
  - Sandhill Upland Lake
  - Scrubby Flatwoods
  - Sinkhole
  - Successional Hardwood
  - Xeric Hammock
