# Supplementary material
Source: PubMed Central journal article supplement (PMC8027831)
Supplement: 41396_2020_788_MOESM6_ESM.pdf [file 41396_2020_788_MOESM6_ESM.pdf]

| Unit       | 10-hr fuel moisture (%) | Duff moisture | Estimate Duff Depth (cm) | Fuel load adjustment | Fuel model*                                | Fuel load (ton km <sup>-2</sup> ) |        |      |       |
|------------|-------------------------|---------------|--------------------------|----------------------|--------------------------------------------|-----------------------------------|--------|------|-------|
|            |                         |               |                          |                      |                                            | duff                              | litter | herb | shrub |
| D-1b       | 13.5                    | dry           | 0.51                     | Low                  | SAF070-LLP rough age 3                     | 403                               | 815    | 111  | 20    |
| C-3        | 18                      | dry           | 0.51                     | Low                  | SAF070-LLP rough age 3                     | 403                               | 815    | 111  | 20    |
| B-6        | 15                      | dry           | 0.89                     | Low                  | SAF070-LLP rough age 4                     | 689                               | 1110   | 87   | 20    |
| B-2b       | 10                      | dry           | 0.51                     | Typical              | SAF070-LLP rough age 2                     | 390                               | 1594   | 198  | 37    |
| B-5        | 10                      | dry           | 0.25                     | Typical              | SRM809-mixed hardwood and pine-rough age 2 | 334                               | 408    | 0    | 222   |
| H-4b & H-3 | 8                       | moderate      | 0.51                     | Typical              | SAF070-LLP rough age 3                     | 806                               | 1630   | 222  | 37    |
| I-3a       | 9.5                     | moderate      | 0.51                     | Low                  | SAF070-LLP rough age 3                     | 403                               | 815    | 111  | 20    |
| B-1a       | 15                      | dry           | 0.51                     | Low                  | SAF070-LLP rough age 3                     | 403                               | 815    | 111  | 20    |
| H-8a/b     | 10.5                    | dry           | 1                        | Typical              | SAF070-LLP rough age 3                     | 806                               | 1630   | 222  | 37    |

\* Society of American Foresters (SAF) and Society for Range Management (SRM) forest cover types: longleaf pine (070 LPP) and mixed hardwood and pine (809). Rough age indicates time (years) since plot was last burned.
