# Supplementary material
Source: PubMed Central journal article supplement (PMC8027831)

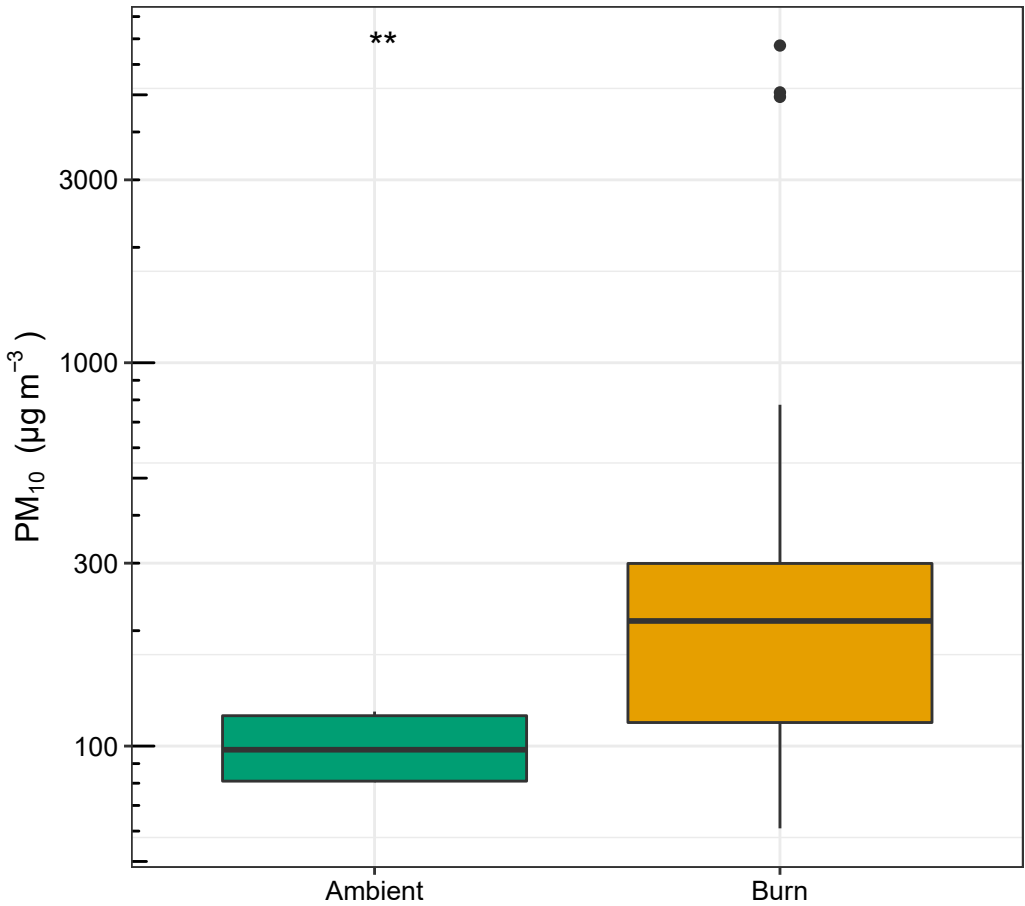

Supplement: 41396_2020_788_MOESM3_ESM.pdf [file 41396_2020_788_MOESM3_ESM.pdf]

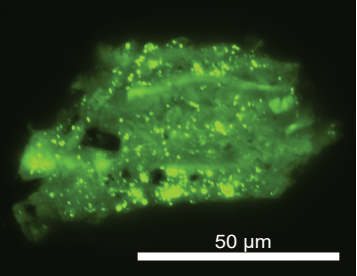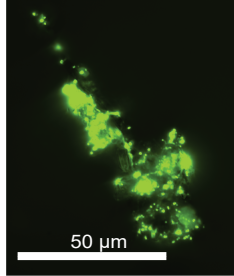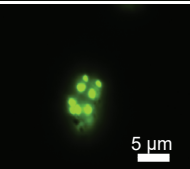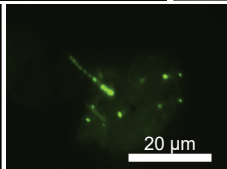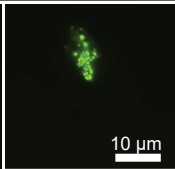

Supplement: 41396_2020_788_MOESM4_ESM.pdf [file 41396_2020_788_MOESM4_ESM.pdf]

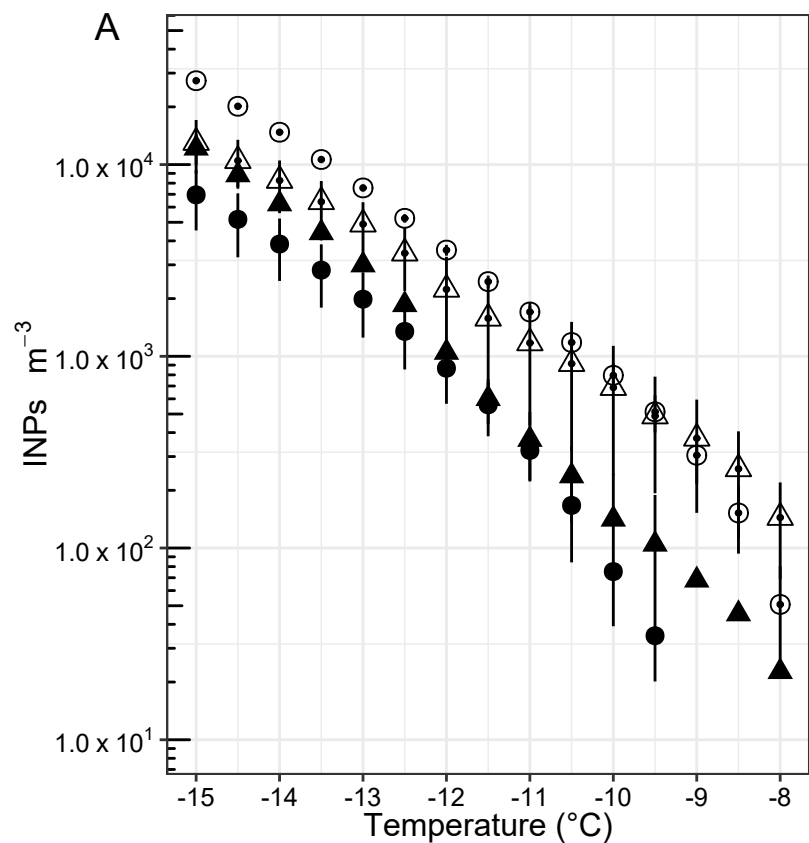

● Ambient ○ Grass/Soil ▲ Runner oak △ Saw palmetto

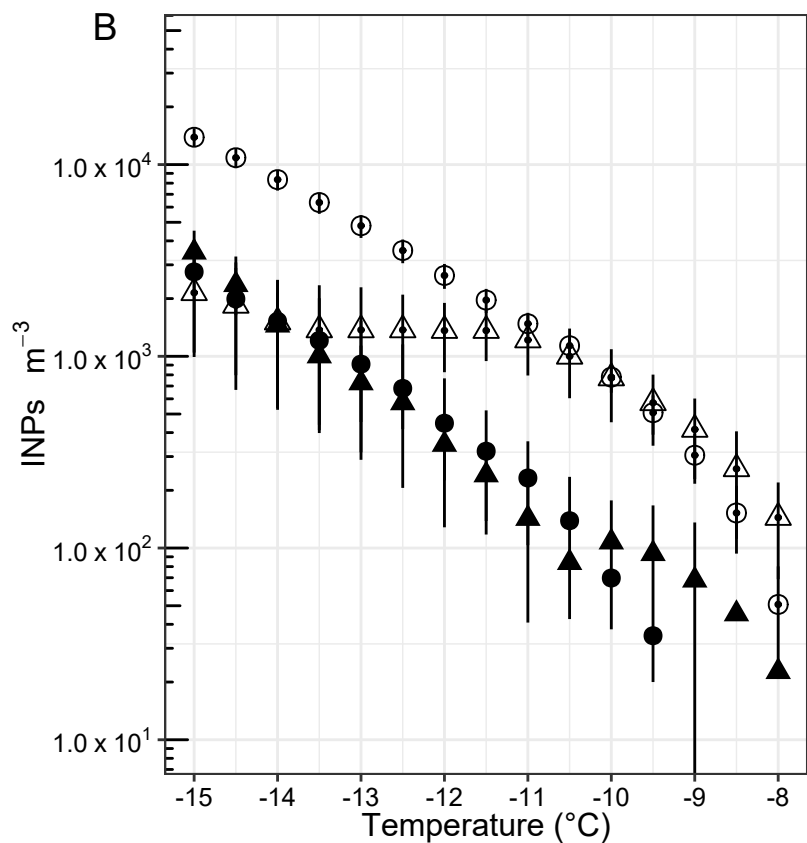

Supplement: 41396_2020_788_MOESM5_ESM.pdf [file 41396_2020_788_MOESM5_ESM.pdf]
